# Supplementary material for: Reactivity of α-amino-peroxyl radicals and consequences for amine oxidation chemistry
Source: Royal Society of Chemistry journal article supplement (doi:10.1039/c2cp41306j), 2012-01-01

# Reactivity of $\alpha$ -amino-Peroxy Radicals and Consequences for Amine Oxidation Chemistry

Martin T. Schümperli,<sup>a</sup> Ceri Hammond,<sup>a</sup> Ive Hermans\*<sup>a</sup>

<sup>a</sup> ETH Zurich, Department of Chemistry and Applied Bio-Sciences, Wolfgang-Pauli-Strasse 10, 8093 Zurich,  
Switzerland. Fax: 41 44 6331514; Tel: 41 44 6334258; E-mail: hermans@chem.ethz.ch

## Supporting Information

### Solvent effect (PCM-DFT//DFT level)

| Solvent           | $\epsilon$ | E(HOO) | E(H-abstr) | (e-1)/(2e+1) | $\Delta E(\text{HOO})$ | $\Delta E(\text{H-abs})$ |
|-------------------|------------|--------|------------|--------------|------------------------|--------------------------|
| 1-Propanol        | 20.524     | 9.4    | 11.2       | 0.46432      | -2.9                   | 4                        |
| 2-Pentanone       | 15.2       | 9.6    | 11.2       | 0.45223      | -2.7                   | 4                        |
| Acetonitrile      | 35.688     | 9.3    | 11.2       | 0.47927      | -3                     | 4                        |
| DiChloroEthane    | 10.125     | 9.8    | 11.1       | 0.42941      | -2.5                   | 3.9                      |
| DiMethylSulfoxide | 46.826     | 9.2    | 11.2       | 0.48415      | -3.1                   | 4                        |
| Vacuum            | 1          | 12.3   | 7.2        | 0.00000      | 0                      | 0                        |
| Ar                | 1.43       | 11.9   | 10.9       | 0.11140      | -0.4                   | 3.7                      |
| Krypton           | 1.519      | 11.8   | 10.9       | 0.12853      | -0.5                   | 3.7                      |
| Xenon             | 1.706      | 11.7   | 10.9       | 0.16002      | -0.6                   | 3.7                      |
| MethylPentane     | 1.89       | 11.5   | 10.9       | 0.18619      | -0.8                   | 3.7                      |
| 1-Hexene          | 2.0717     | 11.4   | 10.9       | 0.20836      | -0.9                   | 3.7                      |
| 1,4-Dioxane       | 2.2099     | 11.3   | 10.9       | 0.22323      | -1                     | 3.7                      |
| CarbonDiSulfide   | 2.6105     | 11.1   | 11         | 0.25888      | -1.2                   | 3.8                      |
| DibutylEther      | 3.0473     | 10.9   | 11         | 0.28857      | -1.4                   | 3.8                      |
| diethylamine      | 3.5766     | 10.7   | 11.2       | 0.31602      | -1.6                   | 4                        |

## Date from Figures 1-5

**Figure 1** Correlation between the computed H-abstraction barrier (DFT//DFT level) and the  $\alpha$ C-H bond strength (B3LYP/6-311++G(d,p) level) for various amines and alcohols.

| <i>C-H Bond Strength</i> | <i>H-abstraction barrier</i> |
|--------------------------|------------------------------|
| 93.2                     | 14.0                         |
| 91.1                     | 11.8                         |
| 89.5                     | 10.3                         |
| 89.2                     | 9.9                          |
| 87.6                     | 8.5                          |
| 86                       | 7.7                          |
| 88.5                     | 9.2                          |

**Figure 2** Computed H-CH<sub>2</sub>X bond strength (B3LYP/6-311++G(d,p) level) vs. the Mulliken spin density on the C-atom in the  $\bullet$ CH<sub>2</sub>X radical (see text).

| <i>spin density on C</i> | <i>HCH2-X BDE</i> |
|--------------------------|-------------------|
| 1.145                    | 102.9             |
| 1.05                     | 98.6              |
| 0.982                    | 93.2              |
| 0.926                    | 89.2              |
| 1.093                    | 98.0              |
| 1.07                     | 98.9              |
| 0.908                    | 88.5              |

**Figure 3** Computed barriers for HO<sub>2</sub> $\bullet$ -elimination (average of high levels of theory in Tables 3-6) and H-abstraction (DFT//DFT level) by  $\alpha$ -amino-peroxyl radicals vs.  $\alpha$ C-H bond strength (B3LYP/6-311++G(d,p)-level) for various amines.

| <i>CH BDE</i> | <i>H-abstr barrier</i> | <i>HO<sub>2</sub><math>\bullet</math>-elimination</i> |
|---------------|------------------------|-------------------------------------------------------|
| 89.2          | 12                     | 18.1                                                  |
| 87.6          | 10.6                   | 17.1                                                  |
| 86            | 7.2                    | 16.65                                                 |
| 88.5          | 11.1                   | 17.45                                                 |

**Figure 4** Kirkwood plot for the correlation of the changes in activation barrier for HO<sub>2</sub><sup>•</sup>-elimination and bimolecular H-abstraction from <sup>i</sup>PrNH<sub>2</sub> as predicted by PCM-DFT//DFT for <sup>•</sup>OOC(CH<sub>3</sub>)<sub>2</sub>NH<sub>2</sub>.

| $(\epsilon-1)/(2\epsilon+1)$ | <i>Delta barrier HO2-elim</i> | <i>Delta barrier H-abstr</i> |
|------------------------------|-------------------------------|------------------------------|
| 0.46433                      | -2.9                          | 4.0                          |
| 0.45223                      | -2.7                          | 4.0                          |
| 0.47927                      | -3.0                          | 4.0                          |
| 0.42941                      | -2.5                          | 3.9                          |
| 0.48415                      | -3.1                          | 4.0                          |
| 0.1114                       | -0.4                          | 3.7                          |
| 0.12853                      | -0.5                          | 3.7                          |
| 0.16002                      | -0.6                          | 3.7                          |
| 0.18619                      | -0.8                          | 3.7                          |
| 0.20836                      | -0.9                          | 3.7                          |
| 0.22324                      | -1.0                          | 3.7                          |
| 0.25888                      | -1.2                          | 3.8                          |
| 0.28857                      | -1.4                          | 3.8                          |
| 0.31602                      | -1.6                          | 3.9                          |

**Figure 5** Imine/ $\alpha$ -amino-hydroperoxide selectivity for the case of isopropylamine at 353 K as a function of  $(\epsilon-1)/(2\epsilon+1)$  (amine concentration is assumed to be 1 M).

| $(\epsilon-1)/(2\epsilon+1)$ | <i>imine/hydroperoxide</i> |
|------------------------------|----------------------------|
| 0.1114                       | 5                          |
| 0.12853                      | 6                          |
| 0.16002                      | 6                          |
| 0.18619                      | 9                          |
| 0.20836                      | 10                         |
| 0.22324                      | 11                         |
| 0.25888                      | 17                         |
| 0.28857                      | 23                         |
| 0.31602                      | 41                         |
| 0.42941                      | 129                        |
| 0.45223                      | 198                        |
| 0.46433                      | 264                        |
| 0.47927                      | 304                        |
| 0.48415                      | 351                        |

## Cartesian coordinates of the involved Transition States.

### HOO<sup>•</sup> elimination from methylamino-peroxyl radical

Transition state (doublet)

Cartesian Coordinates (Å)

|   |             |             |             |
|---|-------------|-------------|-------------|
| C | -1.17932400 | 0.60448300  | 0.09519300  |
| H | -0.95439600 | 1.09497500  | 1.03736800  |
| H | -1.59297100 | 1.22426000  | -0.69994400 |
| N | -1.13514700 | -0.69993300 | 0.03568500  |
| H | -1.41949000 | -1.05024600 | -0.87944200 |
| H | 0.08161500  | -0.94083000 | 0.21219700  |
| O | 1.10063000  | 0.69061500  | -0.14394200 |
| O | 1.26277200  | -0.57255700 | 0.08255000  |

Energy (Hartree): -245.6423092

ZPE (Hartree): 0.0574439

Level: UB3LYP/6-311(3df,3pd)//UB3Lyp/631G\*\* 5d

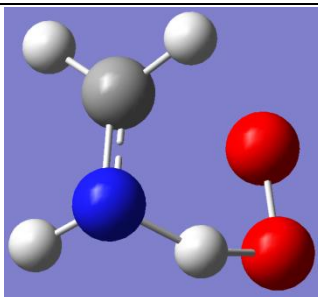

### HOO<sup>•</sup> elimination from ethylamino-peroxyl radical

#### Transition state (doublet)

##### Cartesian Coordinates (Å)

|   |             |             |             |
|---|-------------|-------------|-------------|
| C | 0.90764000  | 0.33300500  | 0.44366100  |
| N | 0.30453500  | 1.32220700  | -0.17315900 |
| O | -1.12403800 | -0.78939100 | 0.49380500  |
| O | -1.66616600 | -0.03631100 | -0.41034400 |
| H | -0.73765700 | 0.80464900  | -0.59029000 |
| H | 1.16203700  | 0.41140000  | 1.50274800  |
| C | 1.52894800  | -0.78819900 | -0.32468800 |
| H | 2.59881500  | -0.57800900 | -0.46242500 |
| H | 1.43906700  | -1.73344400 | 0.21548300  |
| H | 1.07126500  | -0.88456600 | -1.31165700 |
| H | 0.03683200  | 2.06129300  | 0.47672900  |

Energy (Hartree): -284.979953

ZPE (Hartree): 0.0847653

Level: UB3LYP/6-311(3df,3pd)//UB3Lyp/631G\*\* 5d

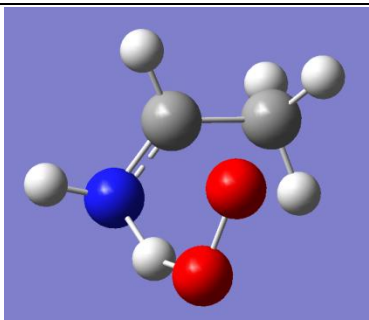

### HOO<sup>•</sup> elimination from iso-propylamino-peroxyl radical

#### Transition state (doublet)

##### Cartesian Coordinates (Å)

|   |             |             |             |
|---|-------------|-------------|-------------|
| C | -0.72618700 | -0.02227600 | 0.23606200  |
| C | -1.68819000 | -0.77777800 | -0.63619600 |
| H | -1.55549000 | -0.48724300 | -1.68238300 |
| H | -1.55115300 | -1.85906000 | -0.55256500 |
| H | -2.72239900 | -0.53431300 | -0.36043900 |
| C | -0.77867700 | 1.47940900  | 0.19141800  |
| H | -1.69249000 | 1.81982200  | 0.69811000  |
| H | 0.07800900  | 1.91433900  | 0.70839200  |
| H | -0.80673600 | 1.84612000  | -0.83699400 |
| N | -0.04021800 | -0.59145000 | 1.20407800  |
| H | -0.14590300 | -1.60629900 | 1.19621200  |
| H | 1.12275200  | -0.33200800 | 0.95019600  |
| O | 1.29923400  | 0.05824700  | -0.97984100 |
| O | 2.03992300  | -0.14541500 | 0.06774300  |

Energy (Hartree): -324.3169968

ZPE (Hartree): 0.111093

Level: UB3LYP/6-311(3df,3pd)//UB3Lyp/631G\*\* 5d

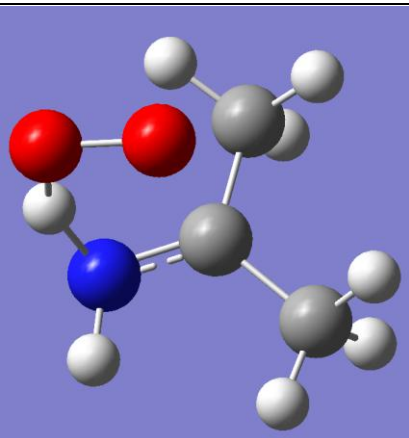

### HOO<sup>•</sup> elimination from sec-methylamino-peroxyl radical

#### Transition state (doublet)

##### Cartesian Coordinates (Å)

|   |             |             |             |
|---|-------------|-------------|-------------|
| C | 0.34647800  | 1.25664800  | -0.09844300 |
| H | -0.34749400 | 1.81690500  | -0.71424200 |
| H | 0.76954600  | 1.74947400  | 0.77762000  |
| N | 0.78614800  | 0.10502900  | -0.51814900 |
| H | -0.20428900 | -0.53574100 | -0.69605700 |
| O | -1.66764400 | 0.19407600  | 0.46908400  |
| O | -1.40513200 | -0.84517500 | -0.25753000 |
| C | 1.77902100  | -0.61171800 | 0.28401000  |
| H | 2.09438400  | -0.03478200 | 1.16106000  |
| H | 1.35608100  | -1.56204000 | 0.62305100  |
| H | 2.65795000  | -0.82980500 | -0.33022700 |

Energy (Hartree): -284.9640075

ZPE (Hartree): 0.083018

Level: UB3LYP/6-311(3df,3pd)//UB3Lyp/631G\*\* 5d

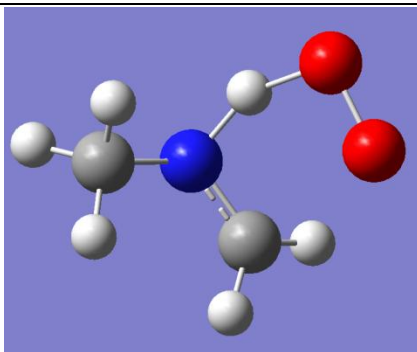

### Bimolecular methylamine $\alpha$ -hydrogen abstraction by methylamino-peroxy radical

#### Transition state (doublet)

##### Cartesian Coordinates (Å)

|   |             |             |             |
|---|-------------|-------------|-------------|
| C | -2.00070100 | 0.12705700  | -0.40878000 |
| H | -2.11011400 | -0.31854500 | -1.40154900 |
| H | -0.93637000 | 0.89028700  | -0.50956400 |
| N | -1.73958900 | -0.83018200 | 0.58724000  |
| H | -0.88913700 | -1.36258800 | 0.38588900  |
| H | -1.68506800 | -0.43473400 | 1.51970600  |
| O | 0.19011300  | 1.44773400  | -0.44991300 |
| O | 0.75286200  | 0.80442200  | 0.68676100  |
| C | 1.70919600  | -0.12609800 | 0.21506000  |
| N | 1.08455900  | -1.24451000 | -0.48754400 |
| H | 0.86875600  | -0.95528700 | -1.43847700 |
| H | 1.73227200  | -2.02584900 | -0.54773000 |
| H | 2.44483900  | 0.41652900  | -0.39637400 |
| H | 2.19589300  | -0.50337300 | 1.12119700  |
| H | -2.83063700 | 0.79339600  | -0.16343000 |

Energy (Hartree): -341.5552478

ZPE (Hartree): 0.122782

Level: UB3LYP/6-311(3df,3pd)//UB3Lyp/631G\*\* 5d

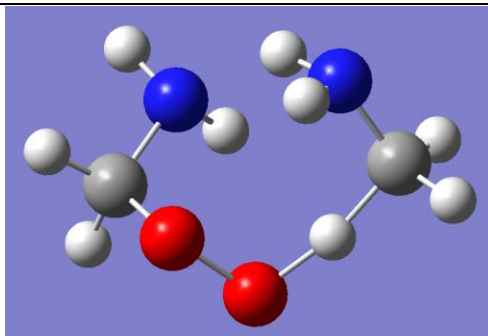



### Bimolecular ethylamine $\alpha$ -hydrogen abstraction by ethylamino-peroxyl radical

#### Transition state (doublet)

##### Cartesian Coordinates (Å)

|   |             |             |             |
|---|-------------|-------------|-------------|
| C | 1.96182200  | -0.32297200 | 0.33294400  |
| H | 2.11864500  | -0.64031000 | 1.37091500  |
| H | 1.10449400  | 0.64679600  | 0.45389500  |
| N | 1.31632400  | -1.33528800 | -0.40915700 |
| H | 0.42049500  | -1.59633500 | 0.01064200  |
| H | 1.16789900  | -1.07268700 | -1.37934900 |
| C | 3.20032900  | 0.26365200  | -0.31443000 |
| H | 3.60367900  | 1.07881500  | 0.29276900  |
| H | 3.98423500  | -0.49435400 | -0.43711500 |
| H | 2.96669300  | 0.67148800  | -1.30468900 |
| O | 0.13361700  | 1.47264800  | 0.44211300  |
| O | -0.73154000 | 0.86499100  | -0.50521800 |
| C | -1.81518800 | 0.26684300  | 0.20111900  |
| C | -2.75327100 | -0.28709900 | -0.86045200 |
| H | -2.25530900 | -1.07880300 | -1.42693100 |
| H | -3.65432500 | -0.70127100 | -0.39703200 |
| H | -3.05239500 | 0.50797500  | -1.54739500 |
| N | -1.31349600 | -0.80097200 | 1.06947500  |
| H | -0.79689400 | -0.36130300 | 1.82874900  |
| H | -2.09567500 | -1.29774000 | 1.48975800  |
| H | -2.31010200 | 1.06789300  | 0.77330800  |

Energy (Hartree): -420.2210396

ZPE (Hartree): 0.1789019

Level: UB3LYP/6-311(3df,3pd)//UB3LYP/631G\*\* 5d

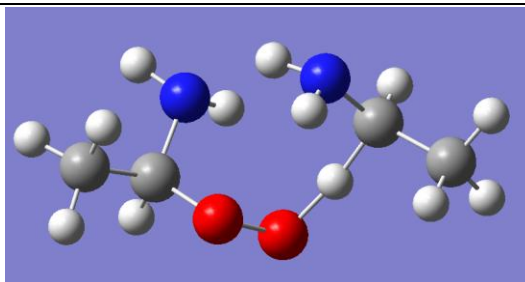

### Bimolecular iso-propylamine $\alpha$ -hydrogen abstraction by iso-propylamino-peroxyl radical

#### Transition state (doublet)

##### Cartesian Coordinates (Å)

|   |             |             |             |
|---|-------------|-------------|-------------|
| C | 2.21574000  | 0.04062400  | -0.02907500 |
| C | 2.54381300  | 0.56522900  | 1.35924100  |
| C | 2.03337000  | 1.10856300  | -1.09613400 |
| H | 1.78668400  | 1.27965200  | 1.69256500  |
| H | 2.58629400  | -0.24707500 | 2.09384500  |
| H | 1.27765400  | 1.83616700  | -0.79035800 |
| H | 1.70462000  | 0.66857800  | -2.04342200 |
| C | -2.01454600 | 0.05258400  | 0.06059300  |
| C | -2.95991200 | 0.68771100  | -0.95848000 |
| C | -1.45532200 | 1.07210700  | 1.05330200  |
| H | -3.82028900 | 1.12140300  | -0.44369000 |
| H | -3.31731900 | -0.06622600 | -1.66688300 |
| H | -2.26347900 | 1.48340000  | 1.66295000  |
| H | -0.73026200 | 0.59142800  | 1.71492000  |
| N | -2.68705200 | -1.00007000 | 0.78029600  |
| H | -3.04081000 | -1.68541300 | 0.11564100  |
| H | -1.99661100 | -1.48464300 | 1.34999900  |
| O | -0.92991500 | -0.45864100 | -0.79378100 |
| O | -0.01694200 | -1.19576900 | -0.00935800 |
| N | 3.11554300  | -0.98216000 | -0.44342700 |
| H | 3.23256700  | -1.71719000 | 0.24671900  |
| H | 2.85909600  | -1.39471600 | -1.33480200 |
| H | 1.02864500  | -0.50864600 | 0.04408100  |
| H | 2.97703900  | 1.64146600  | -1.27310600 |
| H | -2.44755000 | 1.47043600  | -1.52368900 |
| H | 3.51838900  | 1.07154800  | 1.36171900  |
| H | -0.95811600 | 1.88981500  | 0.52385300  |

Energy (Hartree): -498.8825504

ZPE (Hartree): 0.233219

Level: UB3LYP/6-311(3df,3pd)//UB3LYP/631G\*\* 5d

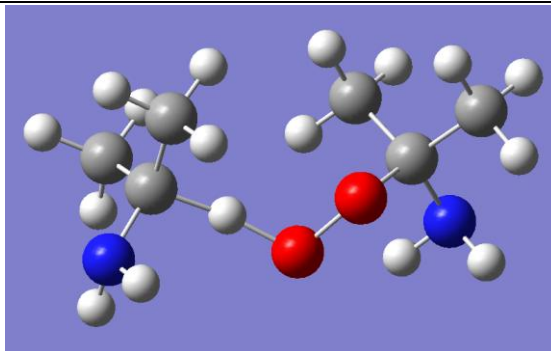

### Bimolecular *sec*-methylamine $\alpha$ -hydrogen abstraction by *sec*-methylamino-peroxyl radical

#### Transition state (doublet)

Cartesian Coordinates (Å)

|   |             |             |             |
|---|-------------|-------------|-------------|
| C | -1.49193500 | 0.16958000  | -0.80888300 |
| N | -2.82305200 | -0.25443200 | -0.53351000 |
| C | -2.99352500 | -1.07076100 | 0.66841600  |
| H | -4.03898300 | -1.38451700 | 0.74407000  |
| H | -2.38389000 | -1.97626900 | 0.57205300  |
| H | -2.70917700 | -0.56880000 | 1.60378100  |
| H | -3.44823700 | 0.54583300  | -0.51766400 |
| O | -1.01169700 | 1.03569200  | 0.24538100  |
| O | 0.28717000  | 1.47058800  | -0.10721100 |
| H | -1.45563200 | 0.72335400  | -1.75400000 |
| H | -0.82698200 | -0.70290300 | -0.87890000 |
| C | 1.91537500  | -0.06946600 | 1.12710900  |
| H | 1.34412600  | -0.99703300 | 1.23173800  |
| H | 2.11855900  | 0.40203100  | 2.09073500  |
| H | 1.04215700  | 0.74417700  | 0.52268800  |
| N | 3.07456300  | -0.23866600 | 0.34997300  |
| H | 3.67061800  | 0.58118600  | 0.33556500  |
| C | 2.91761600  | -0.84681000 | -0.96332900 |
| H | 2.24050900  | -0.27283600 | -1.61372500 |
| H | 3.89288600  | -0.93352000 | -1.44900600 |
| H | 2.50450200  | -1.85452200 | -0.84781600 |

Energy (Hartree): -420.1918144

ZPE (Hartree): 0.1779378

Level: UB3LYP/6-311(3df,3pd)//UB3Lyp/631G\*\* 5d

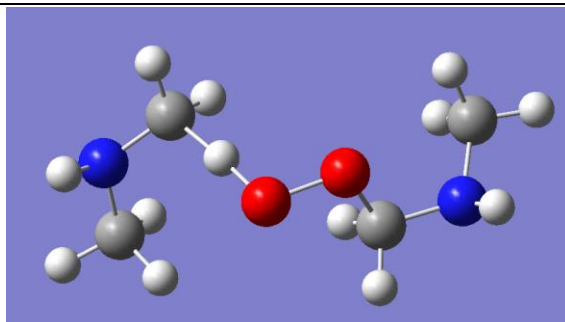

### Bimolecular methylamine $\alpha$ -hydrogen abstraction by methyl-peroxyl radical

#### Transition state (doublet)

##### Cartesian Coordinates (Å)

|   |             |             |             |
|---|-------------|-------------|-------------|
| C | 1.68102900  | 0.35881000  | 0.56945100  |
| H | 0.52638400  | 0.89647200  | 0.18341200  |
| H | 2.43199600  | 1.14469200  | 0.46730400  |
| H | 1.51570700  | 0.07595000  | 1.61204600  |
| N | 1.93277800  | -0.75113200 | -0.26309200 |
| H | 2.13713700  | -0.49326700 | -1.22267000 |
| H | 1.17627000  | -1.42841600 | -0.25606300 |
| O | -0.56896000 | 1.13729800  | -0.31612800 |
| O | -1.04841300 | -0.16940800 | -0.57935700 |
| C | -1.97162300 | -0.50307700 | 0.44974700  |
| H | -2.79752900 | 0.21562500  | 0.47991400  |
| H | -2.35330800 | -1.49695800 | 0.19389800  |
| H | -1.48355400 | -0.53369400 | 1.43249600  |

Energy (Hartree): -286.1742461

ZPE (Hartree): 0.103656

Level: UB3LYP/6-311(3df,3pd)//UB3LYP/631G\*\* 5d

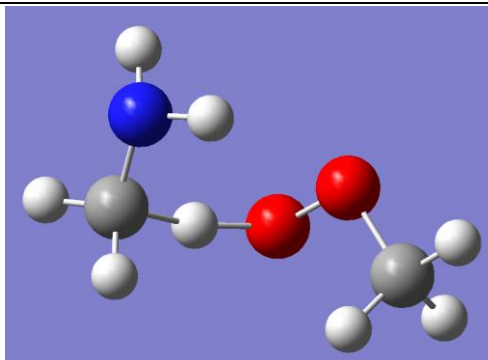

### Bimolecular ethylamine $\alpha$ -hydrogen abstraction by methyl-peroxy radical

#### Transition state (doublet)

##### Cartesian Coordinates (Å)

|   |             |             |             |
|---|-------------|-------------|-------------|
| C | 1.26717100  | 0.10546300  | 0.44141500  |
| H | 0.24127400  | -0.58687500 | 0.00406500  |
| H | 1.05392000  | 0.20003800  | 1.51224300  |
| N | 1.19954300  | 1.36705300  | -0.19918500 |
| H | 0.29265700  | 1.81051800  | -0.08401200 |
| H | 1.40849600  | 1.30902900  | -1.19191800 |
| O | -0.80904600 | -1.00718800 | -0.52038600 |
| O | -1.60448400 | 0.16368300  | -0.52851200 |
| C | -2.51165000 | 0.07515500  | 0.56344800  |
| H | -1.98185900 | 0.05692300  | 1.52456700  |
| H | -3.13732400 | 0.97156200  | 0.50178600  |
| H | -3.13601700 | -0.82072500 | 0.47873100  |
| C | 2.51883700  | -0.69129500 | 0.13907200  |
| H | 2.48021800  | -1.66938700 | 0.62635500  |
| H | 2.62587400  | -0.85990900 | -0.93895400 |
| H | 3.41805100  | -0.16843700 | 0.48900900  |

Energy (Hartree): -325.5065817

ZPE (Hartree): 0.132348

Level: UB3LYP/6-311(3df,3pd)//UB3Lyp/631G\*\* 5d

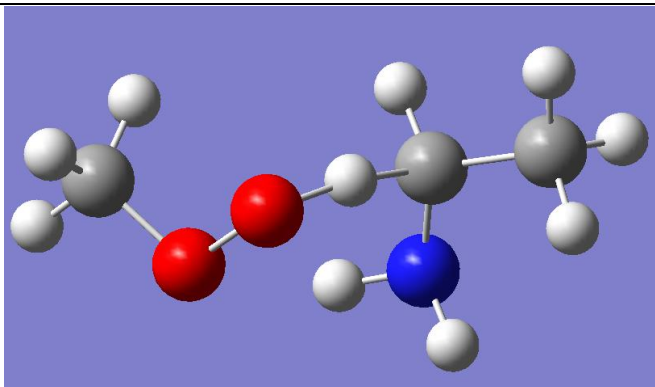

### Bimolecular iso-propylamine $\alpha$ -hydrogen abstraction by methyl-peroxyl radical

#### Transition state (doublet)

##### Cartesian Coordinates (Å)

|   |             |             |             |
|---|-------------|-------------|-------------|
| C | -1.16022500 | -0.08252600 | 0.04067800  |
| H | -0.06617500 | 0.30977400  | -0.55110700 |
| N | -0.75384800 | -0.66509200 | 1.27318800  |
| H | -0.29344500 | -1.56225900 | 1.15838200  |
| H | -0.15473400 | -0.04897900 | 1.81509200  |
| C | -1.90469800 | 1.22933700  | 0.24106700  |
| H | -2.09648200 | 1.71266000  | -0.72090800 |
| H | -2.86582000 | 1.05851100  | 0.74321100  |
| H | -1.31815400 | 1.92356400  | 0.85143700  |
| O | 1.04595000  | 0.79334900  | -0.89206900 |
| O | 1.83205500  | 0.55871100  | 0.25943600  |
| C | 2.65606000  | -0.56913200 | -0.00315700 |
| H | 3.29060700  | -0.39299700 | -0.87841200 |
| H | 2.05812000  | -1.47481800 | -0.16970700 |
| C | -1.84373100 | -1.07674600 | -0.88252800 |
| H | -2.03977600 | -0.62408200 | -1.85836800 |
| H | -1.22277500 | -1.96516700 | -1.04471000 |
| H | -2.80239000 | -1.40722600 | -0.46057000 |
| H | 3.27948200  | -0.69540700 | 0.88804700  |

Energy (Hartree): -364.8382329

ZPE (Hartree): 0.160136

Level: UB3LYP/6-311(3df,3pd)//UB3LYP/631G\*\* 5d

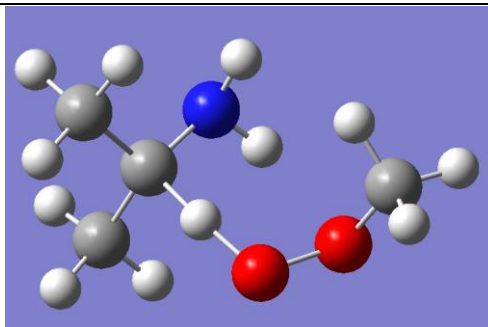

### Bimolecular *sec*-methylamine $\alpha$ -hydrogen abstraction by methyl-peroxyl radical

#### Transition state (dublet)

##### Cartesian Coordinates (Å)

|   |             |             |             |
|---|-------------|-------------|-------------|
| C | -1.10286600 | -0.96202600 | 0.57612400  |
| H | 0.00266900  | -0.79620800 | -0.15010700 |
| H | -1.24374200 | -2.04341900 | 0.62930500  |
| H | -0.81600800 | -0.53363400 | 1.54147400  |
| N | -2.19994500 | -0.29909600 | -0.00070200 |
| H | -2.54856600 | -0.75225800 | -0.83774200 |
| O | 0.99052900  | -0.57970600 | -0.84681300 |
| O | 2.05875100  | -0.48683100 | 0.07576800  |
| C | 2.32923900  | 0.88876800  | 0.28751600  |
| H | 1.47998000  | 1.39816900  | 0.76376200  |
| H | 3.19542600  | 0.91914900  | 0.95660000  |
| H | 2.57041600  | 1.39479000  | -0.65458600 |
| C | -2.11550100 | 1.14783900  | -0.13240400 |
| H | -1.26063400 | 1.46402200  | -0.74926800 |
| H | -3.03778500 | 1.53312600  | -0.57454600 |
| H | -2.00161300 | 1.59474400  | 0.86096600  |

Energy (Hartree): -325.493649

ZPE (Hartree): 0.131880

Level: UB3LYP/6-311(3df,3pd)//UB3Lyp/631G\*\* 5d

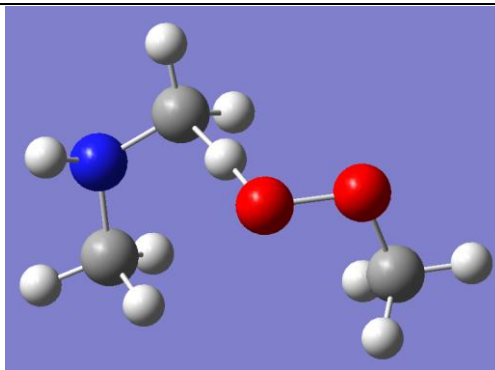

Supplement: c2cp41306j.pdf [file c2cp41306j.pdf]
